# Supplementary material for: Entropy of city street networks linked to future spatial navigation ability
Source: bioRxiv or medRxiv preprint supplement (doi:10.1101/2020.01.23.917211), 2022-01-10
Supplement: Supplementary file [file media-1.pdf]

Table S1: For each country, the number of participants included in the analysis (N), their mean age, the proportion of males vs females, tertiary vs secondary education and city vs non-city home environment.

| Country              | N      | Age ( $M \pm SD$ ) | Males | Females | Tertiary | Secondary | City | Non-City |
|----------------------|--------|--------------------|-------|---------|----------|-----------|------|----------|
| United Arab Emirates | 791    | 36.93 $\pm$ 12.93  | 0.7   | 0.3     | 0.82     | 0.18      | 0.45 | 0.55     |
| Albania              | 700    | 27.94 $\pm$ 10.49  | 0.55  | 0.45    | 0.68     | 0.32      | 0.66 | 0.34     |
| Argentina            | 2038   | 35.18 $\pm$ 13.78  | 0.6   | 0.4     | 0.78     | 0.22      | 0.46 | 0.54     |
| Austria              | 2156   | 38.04 $\pm$ 14.24  | 0.59  | 0.41    | 0.69     | 0.31      | 0.34 | 0.66     |
| Australia            | 9236   | 41 $\pm$ 15.56     | 0.48  | 0.52    | 0.71     | 0.29      | 0.1  | 0.9      |
| Belgium              | 2224   | 40.24 $\pm$ 15.54  | 0.59  | 0.41    | 0.69     | 0.31      | 0.23 | 0.77     |
| Canada               | 12366  | 41.82 $\pm$ 15.86  | 0.51  | 0.49    | 0.75     | 0.25      | 0.27 | 0.73     |
| Switzerland          | 710    | 35.56 $\pm$ 13.76  | 0.54  | 0.46    | 0.8      | 0.2       | 0.19 | 0.81     |
| Czech Republic       | 17857  | 30.83 $\pm$ 11.74  | 0.53  | 0.47    | 0.32     | 0.68      | 0.46 | 0.54     |
| Germany              | 38204  | 41.88 $\pm$ 14.21  | 0.53  | 0.47    | 0.61     | 0.39      | 0.32 | 0.68     |
| Denmark              | 1872   | 38.26 $\pm$ 13.93  | 0.65  | 0.35    | 0.79     | 0.21      | 0.21 | 0.79     |
| Spain                | 7908   | 38.17 $\pm$ 13.89  | 0.59  | 0.41    | 0.75     | 0.25      | 0.49 | 0.51     |
| Finland              | 742    | 35.96 $\pm$ 12.25  | 0.61  | 0.39    | 0.77     | 0.23      | 0.23 | 0.77     |
| France               | 8852   | 38.27 $\pm$ 15.56  | 0.57  | 0.43    | 0.75     | 0.25      | 0.3  | 0.7      |
| United Kingdom       | 76678  | 44.34 $\pm$ 15     | 0.55  | 0.45    | 0.76     | 0.24      | 0.15 | 0.85     |
| Greece               | 26906  | 33.8 $\pm$ 11.49   | 0.59  | 0.41    | 0.69     | 0.31      | 0.55 | 0.45     |
| Croatia              | 839    | 36.31 $\pm$ 13.21  | 0.54  | 0.46    | 0.62     | 0.38      | 0.52 | 0.48     |
| Hungary              | 11513  | 32.21 $\pm$ 12.24  | 0.55  | 0.45    | 0.43     | 0.57      | 0.37 | 0.63     |
| Indonesia            | 1248   | 27.5 $\pm$ 9.12    | 0.69  | 0.31    | 0.86     | 0.14      | 0.48 | 0.52     |
| Ireland              | 1611   | 41 $\pm$ 14.36     | 0.59  | 0.41    | 0.77     | 0.23      | 0.17 | 0.83     |
| India                | 3796   | 27.13 $\pm$ 8.94   | 0.85  | 0.15    | 0.91     | 0.09      | 0.52 | 0.48     |
| Iran                 | 1171   | 32.61 $\pm$ 10.12  | 0.72  | 0.28    | 0.91     | 0.09      | 0.82 | 0.18     |
| Italy                | 13307  | 36.27 $\pm$ 14.25  | 0.6   | 0.4     | 0.4      | 0.6       | 0.41 | 0.59     |
| Malaysia             | 1315   | 29.45 $\pm$ 11.23  | 0.6   | 0.4     | 0.82     | 0.18      | 0.34 | 0.66     |
| Netherlands          | 25538  | 37.05 $\pm$ 14.13  | 0.45  | 0.55    | 0.61     | 0.39      | 0.29 | 0.71     |
| Norway               | 1234   | 36.05 $\pm$ 13.06  | 0.58  | 0.42    | 0.78     | 0.22      | 0.16 | 0.84     |
| New Zealand          | 1989   | 41.7 $\pm$ 15.79   | 0.44  | 0.56    | 0.75     | 0.25      | 0.11 | 0.89     |
| Poland               | 10127  | 30.53 $\pm$ 12.25  | 0.51  | 0.49    | 0.87     | 0.13      | 0.48 | 0.52     |
| Romania              | 3490   | 30.2 $\pm$ 9.84    | 0.64  | 0.36    | 0.65     | 0.35      | 0.61 | 0.39     |
| Russia               | 2968   | 27.81 $\pm$ 9.04   | 0.65  | 0.35    | 0.87     | 0.13      | 0.71 | 0.29     |
| Saudi Arabia         | 577    | 30.98 $\pm$ 10.93  | 0.66  | 0.34    | 0.88     | 0.12      | 0.69 | 0.31     |
| Sweden               | 1939   | 36.72 $\pm$ 13.43  | 0.63  | 0.37    | 0.78     | 0.22      | 0.22 | 0.78     |
| Slovakia             | 5266   | 30.19 $\pm$ 11.33  | 0.55  | 0.45    | 0.37     | 0.63      | 0.44 | 0.56     |
| Thailand             | 977    | 31.81 $\pm$ 13.19  | 0.62  | 0.38    | 0.89     | 0.11      | 0.4  | 0.6      |
| Ukraine              | 712    | 28.36 $\pm$ 10.33  | 0.72  | 0.28    | 0.88     | 0.12      | 0.61 | 0.39     |
| United States        | 101756 | 40.7 $\pm$ 15.6    | 0.48  | 0.52    | 0.8      | 0.2       | 0.13 | 0.87     |
| Viet Nam             | 596    | 26.54 $\pm$ 12.64  | 0.66  | 0.34    | 0.78     | 0.22      | 0.67 | 0.33     |
| South Africa         | 1298   | 40.46 $\pm$ 15.33  | 0.58  | 0.42    | 0.77     | 0.23      | 0.09 | 0.91     |
