# Supplementary material for: Entropy of city street networks linked to future spatial navigation ability
Source: bioRxiv or medRxiv preprint supplement (doi:10.1101/2020.01.23.917211), 2022-01-10
Supplement: Supplementary file [file media-2.pdf]

Table S2: For each country, the ten biggest cities in term of population, with the Shannon entropy of the cities' orientations' distribution. The distributions were computed from the street network within 1000 meters of the city geographical center.

| Country        | City                       | Population | Entropy |
|----------------|----------------------------|------------|---------|
| Albania        | Tirana                     | 374801     | 3.3546  |
| Albania        | Durres                     | 122034     | 3.4006  |
| Albania        | Elbasan                    | 109093     | 3.4768  |
| Albania        | Vlore                      | 89546      | 3.3054  |
| Albania        | Shkoder                    | 88245      | 3.5182  |
| Albania        | Kamez                      | 66841      | 2.1037  |
| Albania        | Korce                      | 58259      | 3.4273  |
| Albania        | Fier                       | 56297      | 3.2984  |
| Albania        | Berat                      | 46866      | 3.5322  |
| Albania        | Lushnje                    | 41469      | 3.3749  |
| Argentina      | Buenos Aires               | 2890151    | 3.362   |
| Argentina      | Cordoba                    | 1317298    | 2.512   |
| Argentina      | Rosario                    | 1193605    | 2.4631  |
| Argentina      | La Plata                   | 643133     | 2.0086  |
| Argentina      | Mar del Plata              | 593337     | 2.29    |
| Argentina      | San Miguel de Tucuman      | 548866     | 1.9364  |
| Argentina      | Salta                      | 520683     | 2.5266  |
| Argentina      | Santa Fe de la Vera Cruz   | 391164     | 2.6401  |
| Argentina      | Vicente Lopez              | 360078     | 2.1252  |
| Argentina      | Corrientes                 | 346334     | 2.2493  |
| Australia      | Sydney                     | 5131326    | 3.4514  |
| Australia      | Melbourne                  | 4850740    | 2.8113  |
| Australia      | Brisbane                   | 2408223    | 3.3015  |
| Australia      | Perth                      | 2050138    | 3.0183  |
| Australia      | Adelaide                   | 1313927    | 2.2874  |
| Australia      | Gold Coast                 | 591473     | 3.0161  |
| Australia      | Canberra                   | 367752     | 3.3699  |
| Australia      | Newcastle                  | 308308     | 3.3825  |
| Australia      | Wollongong                 | 292190     | 2.9386  |
| Australia      | Logan City                 | 282673     | 3.0762  |
| Austria        | Vienna                     | 1840573    | 3.478   |
| Austria        | Graz                       | 273838     | 3.5172  |
| Austria        | Linz                       | 198181     | 3.4209  |
| Austria        | Salzburg                   | 148420     | 3.5467  |
| Austria        | Innsbruck                  | 126851     | 3.5364  |
| Austria        | Klagenfurt am Woerthersee  | 90610      | 3.344   |
| Austria        | Villach                    | 58882      | 3.5054  |
| Austria        | Wels                       | 57943      | 3.3453  |
| Austria        | Sankt Poelten              | 49001      | 3.2933  |
| Austria        | Dornbirn                   | 43013      | 3.5349  |
| Belgium        | Antwerp                    | 520504     | 3.3714  |
| Belgium        | Gand                       | 259083     | 3.5577  |
| Belgium        | Charleroi                  | 201256     | 3.4839  |
| Belgium        | Liege                      | 197885     | 3.5298  |
| Belgium        | Brussels                   | 176545     | 3.4987  |
| Belgium        | Brugge                     | 116709     | 3.0161  |
| Belgium        | Namur                      | 106284     | 3.3699  |
| Belgium        | Leuven                     | 92892      | 3.3825  |
| Belgium        | Mons                       | 91277      | 2.9386  |
| Belgium        | Aalst                      | 77534      | 3.0762  |
| Canada         | Toronto                    | 2731571    | 2.4356  |
| Canada         | Vancouver                  | 1837969    | 2.9404  |
| Canada         | Montreal                   | 1704694    | 3.3722  |
| Canada         | Calgary                    | 1239220    | 3.224   |
| Canada         | Ottawa                     | 934243     | 3.0791  |
| Canada         | Edmonton                   | 932546     | 2.7931  |
| Canada         | Mississauga                | 668549     | 3.1894  |
| Canada         | North York                 | 636000     | 3.4946  |
| Canada         | Winnipeg                   | 632063     | 3.324   |
| Canada         | Quebec                     | 528595     | 2.8919  |
| Croatia        | Zagreb                     | 698946     | 3.1258  |
| Croatia        | Split                      | 176314     | 3.5165  |
| Croatia        | Rijeka                     | 141172     | 3.4682  |
| Croatia        | Osijek                     | 88140      | 3.3204  |
| Croatia        | Zadar                      | 71258      | 3.3559  |
| Croatia        | Slavonski Brod             | 60742      | 3.2132  |
| Croatia        | Pula                       | 59078      | 3.4468  |
| Croatia        | Sesvete                    | 52411      | 3.4225  |
| Croatia        | Karlovac                   | 48123      | 3.4722  |
| Croatia        | Varazdin                   | 41803      | 3.4075  |
| Czech Republic | Prague                     | 1391508    | 3.5465  |
| Czech Republic | Brno                       | 454337     | 3.5137  |
| Czech Republic | Ostrava                    | 314590     | 3.3645  |
| Czech Republic | Pilsen                     | 177936     | 3.4624  |
| Czech Republic | Olomouc                    | 102134     | 3.5526  |
| Czech Republic | Liberec                    | 97770      | 3.5513  |
| Czech Republic | Ceske Budejovice           | 96053      | 3.4325  |
| Czech Republic | Hradec Kralove             | 95195      | 3.532   |
| Czech Republic | Usti nad Labem             | 94105      | 3.5359  |
| Czech Republic | Pardubice                  | 88741      | 3.3929  |
| Denmark        | Copenhagen                 | 777218     | 3.357   |
| Denmark        | Aarhus                     | 273077     | 3.4187  |
| Denmark        | Odense                     | 176683     | 3.5186  |
| Denmark        | Aalborg                    | 113417     | 3.3837  |
| Denmark        | Frederiksberg              | 105037     | 3.1706  |
| Denmark        | Esbjerg                    | 72205      | 3.0724  |
| Denmark        | Randers                    | 55780      | 3.5347  |
| Denmark        | Kolding                    | 55363      | 3.5401  |
| Denmark        | Vejle                      | 51177      | 3.4982  |
| Denmark        | Horsens                    | 50074      | 3.466   |
| Finland        | Helsinki                   | 1176976    | 3.2941  |
| Finland        | Tampere                    | 317316     | 3.1892  |
| Finland        | Espoo                      | 272193     | 3.5541  |
| Finland        | Turku                      | 254671     | 3.0954  |
| Finland        | Vantaa                     | 216973     | 3.5426  |
| Finland        | Oulu                       | 128618     | 2.8981  |
| Finland        | Lahti                      | 98826      | 3.342   |
| Finland        | Kuopio                     | 89104      | 3.2965  |
| Finland        | Jyvaeskylae                | 85026      | 3.2022  |
| Finland        | Pori                       | 76772      | 2.993   |
| France         | Paris                      | 2206488    | 3.2257  |
| France         | Marseille                  | 861635     | 3.4166  |
| France         | Lyon                       | 513275     | 3.4257  |
| France         | Toulouse                   | 471941     | 3.5247  |
| France         | Nice                       | 338620     | 3.4793  |
| France         | Nantes                     | 277269     | 3.4552  |
| France         | Strasbourg                 | 274845     | 3.5506  |
| France         | Bordeaux                   | 249712     | 3.3281  |
| France         | Montpellier                | 248252     | 3.5196  |
| France         | Lille                      | 228328     | 3.5176  |
| Germany        | Berlin                     | 3292366    | 3.3941  |
| Germany        | Hamburg                    | 1706696    | 3.5359  |
| Germany        | Munich                     | 1348335    | 3.4454  |
| Germany        | Cologne                    | 1005775    | 3.4143  |
| Germany        | Frankfurt                  | 667925     | 3.5337  |
| Germany        | Essen                      | 593085     | 3.4857  |
| Germany        | Stuttgart                  | 589793     | 3.4566  |
| Germany        | Dortmund                   | 588462     | 3.3599  |
| Germany        | Duesseldorf                | 573057     | 3.3951  |
| Germany        | Bremen                     | 546501     | 3.4126  |
| Greece         | Athens                     | 3090508    | 3.2102  |
| Greece         | Thessaloniki               | 788952     | 3.3539  |
| Greece         | Patras                     | 213984     | 3.3955  |
| Greece         | Heraklion                  | 173993     | 3.5369  |
| Greece         | Piraeus                    | 163688     | 3.2015  |
| Greece         | Larissa                    | 162591     | 3.4687  |
| Greece         | Peristeri                  | 139981     | 3.2822  |
| Greece         | Kallithea                  | 100641     | 2.8862  |
| Greece         | Acharnes                   | 99346      | 3.2714  |
| Greece         | Kalamaria                  | 91617      | 3.3517  |
| Hungary        | Budapest                   | 1736685    | 3.4969  |
| Hungary        | Debrecen                   | 211340     | 3.4778  |
| Hungary        | Szeged                     | 168048     | 3.3476  |
| Hungary        | Miskolc                    | 167754     | 3.3344  |
| Hungary        | Pecs                       | 156049     | 3.2815  |
| Hungary        | Győr                       | 128265     | 3.284   |
| Hungary        | Nyiregyhaza                | 116298     | 3.3351  |
| Hungary        | Kecskemet                  | 109847     | 3.4268  |
| Hungary        | Szekesfehervar             | 101600     | 3.3523  |
| Hungary        | Szombathely                | 79534      | 3.3346  |
| India          | Mumbai                     | 12442373   | 3.4163  |
| India          | Delhi                      | 11034555   | 3.0664  |
| India          | Bengaluru                  | 8443675    | 3.5444  |
| India          | Hyderabad                  | 6809970    | 3.4049  |
| India          | Ahmedabad                  | 5570585    | 3.3743  |
| India          | Chennai                    | 4646732    | 3.3427  |
| India          | Calcutta                   | 4496694    | 3.1185  |
| India          | Surat                      | 4467797    | 3.2842  |
| India          | Pune                       | 3124458    | 3.3735  |
| India          | Jaipur                     | 3046163    | 2.6155  |
| Indonesia      | Jakarta                    | 8540121    | 3.34    |
| Indonesia      | Surabaya                   | 2765487    | 3.3452  |
| Indonesia      | Bandung                    | 2394873    | 3.2091  |
| Indonesia      | Bekasi                     | 2334871    | 3.4804  |
| Indonesia      | Medan                      | 2097610    | 3.3436  |
| Indonesia      | Tangerang                  | 1798601    | 3.3669  |
| Indonesia      | Depok                      | 1738570    | 2.8871  |
| Indonesia      | Semarang                   | 1555984    | 3.3707  |
| Indonesia      | Palembang                  | 1455284    | 3.4239  |
| Indonesia      | Makassar                   | 1338663    | 3.1732  |
| Iran           | Tehran                     | 8693706    | 2.8789  |
| Iran           | Mashhad                    | 3001184    | 3.2538  |
| Iran           | Isfahan                    | 1961260    | 3.5249  |
| Iran           | Karaj                      | 1592492    | 3.4997  |
| Iran           | Shiraz                     | 1565572    | 3.2092  |
| Iran           | Tabriz                     | 1558693    | 3.3245  |
| Iran           | Qom                        | 1201158    | 3.2608  |
| Iran           | Ahvaz                      | 1184788    | 3.0699  |
| Iran           | Kermanshah                 | 946651     | 3.3555  |
| Iran           | Urmia                      | 736224     | 3.5135  |
| Ireland        | Dublin                     | 1173179    | 3.5309  |
| Ireland        | Cork                       | 208669     | 3.4616  |
| Ireland        | Limerick                   | 94192      | 3.4939  |
| Ireland        | Galway                     | 79934      | 3.5461  |
| Ireland        | Waterford                  | 53504      | 3.5343  |
| Ireland        | Drogheda                   | 40956      | 3.4411  |
| Ireland        | Swords                     | 36924      | 3.5243  |
| Ireland        | Dundalk                    | 33428      | 3.4089  |
| Ireland        | Bray                       | 32600      | 3.4308  |
| Ireland        | Navan                      | 30173      | 3.5588  |
| Italy          | Rome                       | 2617175    | 3.5635  |
| Italy          | Milan                      | 1242123    | 3.5356  |
| Italy          | Naples                     | 962003     | 3.4168  |
| Italy          | Turin                      | 872367     | 2.6495  |
| Italy          | Palermo                    | 657651     | 3.4205  |
| Italy          | Genoa                      | 580223     | 3.5029  |
| Italy          | Bologna                    | 366133     | 3.2943  |
| Italy          | Florence                   | 349296     | 3.4903  |
| Italy          | Catania                    | 290927     | 3.3557  |
| Italy          | Bari                       | 277387     | 3.0293  |
| Malaysia       | Kuala Lumpur               | 1588750    | 3.5488  |
| Malaysia       | George Town                | 708127     | 3.4591  |
| Malaysia       | Ipoh                       | 657892     | 3.3154  |
| Malaysia       | Shah Alam                  | 641306     | 2.8587  |
| Malaysia       | Petalang Jaya              | 613977     | 3.5111  |
| Malaysia       | Iskandar Puteri            | 529074     | 3.4709  |
| Malaysia       | Seremban                   | 515490     | 3.5189  |
| Malaysia       | Johor Bahru                | 497067     | 3.4797  |
| Malaysia       | Melaka                     | 484885     | 3.534   |
| Malaysia       | Kota Kinabalu              | 452058     | 3.1928  |
| Netherlands    | Amsterdam                  | 855896     | 3.4668  |
| Netherlands    | Rotterdam                  | 638751     | 3.5074  |
| Netherlands    | The Hague                  | 531935     | 3.1493  |
| Netherlands    | Utrecht                    | 347526     | 3.5293  |
| Netherlands    | Eindhoven                  | 229184     | 3.5336  |
| Netherlands    | Tilburg                    | 199613     | 2.9831  |
| Netherlands    | Groningen                  | 181194     | 3.3967  |
| Netherlands    | Almere Stad                | 176432     | 2.9416  |
| Netherlands    | Breda                      | 167673     | 3.4425  |
| Netherlands    | Nijmegen                   | 158732     | 3.4565  |
| New Zealand    | Auckland                   | 1628900    | 3.4603  |
| New Zealand    | Wellington                 | 418500     | 3.2524  |
| New Zealand    | Christchurch               | 404500     | 2.7958  |
| New Zealand    | Manukau City               | 362000     | 3.3176  |
| New Zealand    | Hamilton                   | 241200     | 3.3055  |
| New Zealand    | Waitakere                  | 208100     | 2.9181  |
| New Zealand    | North Shore                | 207865     | 3.5276  |
| New Zealand    | Tauranga                   | 141600     | 3.2107  |
| New Zealand    | Dunedin                    | 114347     | 3.2006  |
| New Zealand    | Lower Hutt                 | 101194     | 3.4354  |
| Norway         | Oslo                       | 634463     | 3.4923  |
| Norway         | Bergen                     | 278121     | 3.4499  |
| Norway         | Trondheim                  | 190464     | 3.4758  |
| Norway         | Stavanger                  | 130754     | 3.467   |
| Norway         | Fredrikstad                | 72760      | 3.3602  |
| Norway         | Drammen                    | 64597      | 3.3649  |
| Norway         | Kristiansand               | 63814      | 3.3784  |
| Norway         | Sandnes                    | 63032      | 3.5082  |
| Norway         | Tromso                     | 52436      | 3.3702  |
| Norway         | Sarpsborg                  | 52159      | 3.2642  |
| Poland         | Warszawa                   | 1753977    | 3.4147  |
| Poland         | Krakow                     | 765320     | 3.3804  |
| Poland         | Lodz                       | 696503     | 2.8218  |
| Poland         | Wroclaw                    | 637683     | 3.3512  |
| Poland         | Poznan                     | 540372     | 3.3863  |
| Poland         | Gdansk                     | 461865     | 3.5348  |
| Poland         | Szczecin                   | 407811     | 3.3365  |
| Poland         | Bydgoszcz                  | 366452     | 3.3497  |
| Poland         | Lublin                     | 360044     | 3.4224  |
| Poland         | Katowice                   | 317316     | 3.2129  |
| Romania        | Bucharest                  | 1883425    | 3.5237  |
| Romania        | Cluj-Napoca                | 324576     | 3.4292  |
| Romania        | Timisoara                  | 319279     | 3.5223  |
| Romania        | Constanta                  | 303399     | 3.4261  |
| Romania        | Galati                     | 294087     | 3.429   |
| Romania        | Iasi                       | 290422     | 3.4986  |
| Romania        | Brasov                     | 276088     | 3.4517  |
| Romania        | Craiova                    | 269506     | 3.4718  |
| Romania        | Ploiesti                   | 228851     | 3.5423  |
| Romania        | Braila                     | 213569     | 3.3207  |
| Russia         | Moscow                     | 12380664   | 3.5681  |
| Russia         | Saint Petersburg           | 5281579    | 3.3697  |
| Russia         | Novosibirsk                | 1602915    | 2.9706  |
| Russia         | Yekaterinburg              | 1455514    | 2.7437  |
| Russia         | Nizhny Novgorod            | 1261666    | 3.5155  |
| Russia         | Kazan                      | 1231878    | 3.2368  |
| Russia         | Chelyabinsk                | 1198858    | 3.0055  |
| Russia         | Omsk                       | 1178391    | 3.3659  |
| Russia         | Samara                     | 1169719    | 2.6558  |
| Russia         | Rostov-on-Don              | 1125299    | 2.3556  |
| Russia         | Riyadh                     | 6506700    | 3.2226  |
| Saudi Arabia   | Jeddah                     | 3976400    | 3.4013  |
| Saudi Arabia   | Mecca                      | 1919900    | 3.2144  |
| Saudi Arabia   | Medina                     | 1271800    | 3.1298  |
| Saudi Arabia   | Hofuf                      | 1136900    | 3.0342  |
| Saudi Arabia   | Taif                       | 1109800    | 2.6632  |
| Saudi Arabia   | Dammam                     | 975800     | 3.1812  |
| Saudi Arabia   | Buraidah                   | 658600     | 3.3848  |
| Saudi Arabia   | Khobar                     | 626200     | 3.3369  |
| Saudi Arabia   | Tabuk                      | 609000     | 3.3431  |
| Slovakia       | Bratislava                 | 425923     | 3.3033  |
| Slovakia       | Pesov                      | 239141     | 3.3159  |
| Slovakia       | Kosice                     | 89618      | 3.1563  |
| Slovakia       | Nitra                      | 86329      | 3.4919  |
| Slovakia       | Zilina                     | 81041      | 3.4978  |
| Slovakia       | Banska Bystrica            | 78635      | 3.4755  |
| Slovakia       | Trnava                     | 69785      | 3.2294  |
| Slovakia       | Martin                     | 60817      | 2.9909  |
| Slovakia       | Trencin                    | 58278      | 3.3322  |
| Slovakia       | Poprad                     | 57431      | 3.4538  |
| South Africa   | Cape Town                  | 3433441    | 2.6744  |
| South Africa   | Durban                     | 3120269    | 3.1351  |
| South Africa   | Johannesburg               | 2026482    | 2.4959  |
| South Africa   | Soweto                     | 1695047    | 3.4325  |
| South Africa   | Pretoria                   | 1619438    | 2.6098  |
| South Africa   | Port Elizabeth             | 967677     | 3.3588  |
| South Africa   | Pietermaritzburg           | 750845     | 2.1505  |
| South Africa   | Benoni                     | 605344     | 2.2213  |
| South Africa   | East London                | 511655     | 3.362   |
| South Africa   | East London                | 478676     | 3.1947  |
| Spain          | Madrid                     | 5263000    | 3.5391  |
| Spain          | Barcelona                  | 4251000    | 3.3969  |
| Spain          | Valencia                   | 1499000    | 3.5081  |
| Spain          | Sevilla                    | 1262000    | 3.5601  |
| Spain          | Zaragoza                   | 639000     | 3.3089  |
| Spain          | Malaga                     | 568305     | 3.51    |
| Spain          | Murcia                     | 436870     | 3.3424  |
| Spain          | Palma                      | 401270     | 3.5531  |
| Spain          | Las Palmas de Gran Canaria | 381847     | 3.4432  |
| Spain          | Bilbao                     | 354860     | 3.      |
